# Supplementary material
Source: PubMed Central journal article supplement (PMC4786917)
Supplement: mt2015218x1.pdf [file mt2015218x1.pdf]

## ***Streptococcus thermophilus* CRISPR-Cas9 systems enable specific editing of the human genome**

Maximilian Müller<sup>1,2,3</sup>, Ciaran M. Lee<sup>4,5</sup>, Giedrius Gasiunas<sup>6</sup>, Timothy H. Davis<sup>4,5</sup>, Thomas J. Cradick<sup>4,#</sup>, Virginijus Siksnys<sup>6</sup>, Gang Bao<sup>4,5</sup>, Toni Cathomen<sup>1,2,\*</sup>, and Claudio Mussolino<sup>1,2,\*</sup>

### **SUPPLEMENTARY MATERIAL**

- Figure S1.** Expression levels of Cas9 orthologs.
- Figure S2.** Titration of *CARD11*-specific RGN activity.
- Figure S3.** Amino acid sequences of Cas9 proteins used in this study.
- Figure S4.** DNA sequences of gRNAs used in this study.
- Table S1.** Cas9 orthologs used in this study.
- Table S2.** Sequencing results for *PRKDC*-specific RGNs.
- Table S3.** Sequencing results for *CARD11*-specific RGNs.
- Table S4.** Oligonucleotides used in this study.
- Table S5.** Sequencing primers for *PRKDC*-specific RGNs.
- Table S6.** Sequencing primers for *CARD11*-specific RGNs.

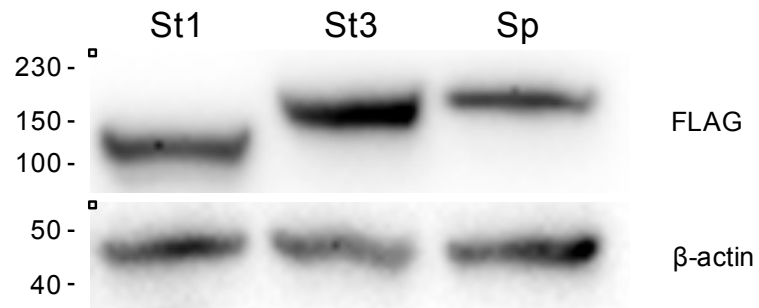

**Supplementary Figure S1. Expression levels of Cas9 orthologs.** The expression levels of the three different Cas9 proteins was assessed in HEK293T cells, two days post-transfection. Cell lysates were assayed using anti-FLAG tag antibody that specifically recognizes FLAG-tagged Cas9 proteins and anti- $\beta$ -actin antibody to monitor the total protein load. Numbers on the left indicate the protein ladder (kDa).

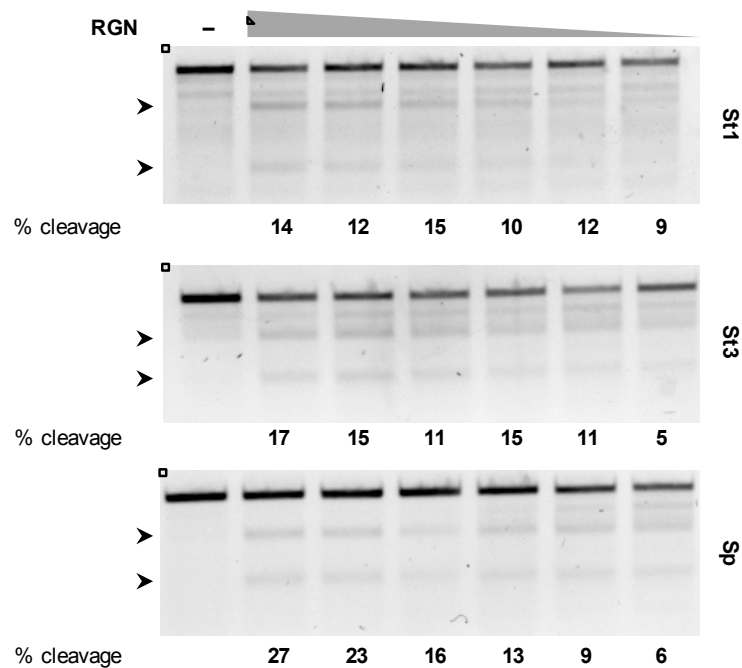

**Supplementary Figure S2. Titration of *CARD11*-specific RGN activity.** The correlation between RGN activity and amount of expression plasmid transfected was assessed in HEK293T cells via T7 endonuclease I (T7EI) assay three days post-transfection. Different amounts of plasmid DNA expressing the Cas9 and the gRNA were transfected using a constant 1:3 ratio. Arrows indicate the positions of the expected cleavage products. Numbers at the bottom show the average percentages of modified alleles (n=3).

***Streptococcus thermophilus* CRISPR1 Cas9 (St1Cas9)**

MSDLVLGLD**I**DIGIGSVGVGILNKVTGEI**I**HKNSRIFPAAQAENNLVRRTRNRQGRRLTRRKKHRRVRLNRLFEEESGLITDFTKIS  
 INLNPYQLRVKGLTDELSNEELFIALKNMVKHRGISYLDASDDGNSSIGDYAQIVKENSQLETKTPGQIQQLERYQTYGQLR  
 GDFTEVKDGKKHRLINVFPTSAYRSEALRILQTTQEEFNQITDEFINRYLEILTGKRKYHGPNEKSRDYGRYRTSGETLD  
 NIFGILIGKCTFPYDFRAAKASYTAQEFNLLNDLNLVPTETKKSKEQKNQIINYVKNEKAMGPAKLFKYIAKLLSCDVA  
 DIKGYRIDKSGKAEIHTFEAYRKMKTLETLDIEQMDRETLDKLAYVLTNTEREGIQEAELEHEFADGSFSQKQVDELVQFRKA  
 NSSIFGKGWHNFSVKLMMELIPELYETSEEQMTILTRLGKQKTTSSSNKTKYIDEKLLTEEIYNPVAKSVRQAIIKIVNAAIK  
 EYGDNDNIVIEMARETNEDEKKAIQKIQKANKDEKDAAMLKAANQYNGKAELPHSVFHGHKQLATKIRLWHQOGERCLYTGK  
 TISIHDLINNSNQFEVD**H**ILPLSITFDDSLANKVLVYATANQEKQRTPYQALDSMDDAWSFRELKAFVRESKTLNKKKEYL  
 LTEEDI SKFDVRKKFIERNLVDTRYASRVVNLALQEHFRAHKIDTKVSVVRGQFTSQRLRRHWGIEKTRDTYHHHAVDALI IAA  
 SSQNLNLWKKQKNTLVSYSEDQLLDIETGELISDDEYKESVFKAPYQHFDVTLKSKEFEDSILFSYQVDSKFNKISDATIYAT  
 RQAKVGKDKADETYVLGKIKDIYTDQGYDAFMKIYKDKSKFLMYRHDPTFEKVIEPILENYPNKQINEKGEVPCNPFLKY  
 KEEHGYIRKYSKKGNGPEIKSLKYDYSKLGNHIDITPKDSNNKVVLSVSPWRADVFNKTTGKYEILGLKYADLQFEKGTGT  
 YKISQEKYNDIKKKEGVSDSEFKFTLYKNDLLLKVDTEKQQLFRFLSRTMPKQKHVELKPYDKQKFEFGGEALIKVLGNV  
 ANSGQCKKGLGKSNISYKVRTDVLGNQHI IKNEGDKPKLDF

***Streptococcus thermophilus* CRISPR3 Cas9 (St3Cas9)**

MTKPYSIGLD**I**DIGTNSVGAVITDNYKVPSSKMKVLGNTSKYIKKNLLGVLLFDSGITAEGRRLKRTARRRYTRRRNRILYLQ  
 EIFSTEMATLDDAFFQRLDDSFVLPDDKRDSKYP IFGNLVEEKVYHDEFPTIYHLRKYADSTKKADLRLVYALAHMIKYRG  
 HFLIEGEFNSKNNDIQKNFQDFLDYNAIFESDLSLENSKQLEEVKDKISKLEKKDRILKLFPGKNSGIFSEFLKLVGNQ  
 ADRKCFNLDEKASLHFSKESYDEDELETLGGYIGDYSDFVLKAKKLYDAIILSGFLTVDNETEAPLSSAMIKRYNEHKEDL  
 ALLKEYIRNISLKYNEVFKDDTKNGYAGYIDGKTNQEDFYVYLNLLAEFEGADYFLEKIDREDFLRKQRTFDNGSIPYQIH  
 LQEMRAILDQAKFYPPFLAKNKERIEKILTFRIPIYVVGPLARGNSDFAWSIRKRNEKITPWNFEDVIDKESSAEAFINRMTSF  
 DLYLPEEKVLPKHSLLYETFNVYNELTKVRFIAESMRDQYFLDSKQKDIVRLYFKDKRKTVDKDIIEYLHAIYGYDGIELKG  
 IEKQFNSSLSTYHDLNIINDKEFLDSSNEAIEEIIHTLTI FEDREMIKQRLSKFENIFDKSVLKKLSRRHYTGWGKLSAK  
 LINGIRDEKSGNTILDYLIIDDGISNRNFMQLIHDDALSFKKKIQKAQIIGDEDKGNIEVVKSLPGSPAIKKILQSIKIVDE  
 LVKVMGGRKPEISVEMARENQYTNQKSNQRLKRLKLEKSKELGSKILKENIPAKLSKIDNNALQNDRLYLYLQNGKDMY  
 TGDDLDIDRLSNYDIDHIIPQAFKDNSIDNKVLSVSS**N**RGKSDDFPSLEVVKKRKTFWYQLLKSCLIQRKFDNLTKAERG  
 GLLPEDKAGFIQRQLVETRQITKHVARLLDEKFNKKDENNRRAVRTVKIITLKSTLVSQFRKDFELYKREINDFHHAHDAYL  
 NAVIASALLKKYPKLEPEFVYGDYPKYNSFRERKSATEKVYFYSNIMNIFKKSISLADGRVIERPLIEVNEETGESVWNKESD  
 LATVRRVLSYPQVNVVKKVEEQNHGLDRGPKGLFNANLSSKPKPNSNENLVGAKEYLDPKKYGGYAGISNSFAVLVKGTEK  
 GAKKIKTNVLEFQGISILDRINRYRDKLNFLLKGYKDIELIIELPKYSLEFELSDGSRMLASILSTNNKRGEIHKGNQFLS  
 QKFVKLLYHAKRISNTINENHRKYVENHKKFEFEELFYILEFNENYVGAKKNGKLLNSAFQSQWQNSIDELCSSFIGPTGSE  
 R KGLFELTSRGSAADEFELGVKIPRYRDYTPSSLLKDATLIHQSVTGLYETRIDLAKLGE

***Streptococcus pyogenes* Cas9 (SpCas9)**

MDKKYSIGLD**I**DIGTNSVGAVITDEYKVPSSKFKVLGNTDRHSIKKNLIGALLFDSGETAEATRLKRTARRRYTRRKNRICYLQ  
 EIFSNEMAKVDDSFHRLLEESFLVEEDKHERHPIFGNIVDEVAYHEKYPTIYHLRKKLV DSTDKADLRLIYLALAHMIKFRG  
 HFLIEGLNPDNSVDKFLFIQLVQTYNQLFEENPINASGVDAKAIL SARLSKSRLENLIAQLPGEKKNGLFGNLIALSILGLT  
 PNFKSNFDLAEDAQLQSKDQYDQYADLFLAANKLSDAIIILSDILRVNTEITKAPLSASMIKRYDEHHDQL  
 TLLKALVRQQLPEKYKEIFFDQSKNGYAGYIDGGASQEEFYKFIKPILEKMDGTEELLVKNLREDDLRRQRTFDNGSIPYQIH  
 LGELHAILRRQEDFYPPFLKDNREKIEKILTFRIPIYVVGPLARGNSRFAWMTRKSEETITPWNFEEVVDKGSASAQSFIERMTNF  
 DKNLPNEKVLKHSLLYEFYVYNELTKVKYVTEGMRKPAFLSGEQKKAIVDLLFKTRKRVTVKQLKEDYFKKIECFDSVEIS  
 GVEDRFNASLGTYHDLKIKKDKFDLNEENEDILEDIVLTLTLFEDREMIERLKYAHLFDKVMKQLKRRRYTGWGRLSR  
 KLINGIRDKQSGKITLDFLKSDFANRNFMLIHDDSLTFKEDIQKAQVSGQDLSHEHIANLAGSPAIKKILQTVKVVDEL  
 VKVMGRHKPENIVIEMARENQTTQKQKNSRERMKRIEIEGKELGSQLKEHPVENTQLQNEKLYLYLQNGRDMYVDQELDI  
 NRLSDYD**V**D**H**IVPQSFVKDDSDNKVLTSDKNRGSNDVPSSEVVKMKNYWRQLLNKLIQTKRFDNLTKAERGGLSELDK  
 AGFIKRLVETRQITKHVAQILDSRMNTKYDENDKLIREVKVIITLKSCLVSDFRKDFQFYKREINNYHHAHDAYLNAVVGTA  
 LIKKYPKLESEFVYGDYKVDVRKMIKSEQEI GKATAKYFFYSNIMNFKTEITLANGEIRKRPLIETNGETGEIVWDKGRD  
 FATVRKVL SMPQVNI VVKTEVQTGGFSKESILPKRNSDKLIARKKDWDPKKYGGFDSPTVAYSVLVAKVEKGSKLLKSVKE  
 LLGITIMERSSEFKNPIDFLEAKGYKEVKKDLI IKLPKYSLEFELNGRKRMLASAGELQKGNELALPSKYVNFYLYASHYEKL  
 KGSPEQNEQQLFVEQHKHYLDEIEQISEFSKRVILADANLDKVL SAYNKHRDKPIREQAENI IHLFTLTLNLGAPAAFKYFD  
 TTIDRKRYTSTKEVLDATLIHQSIITGLYETRIDLSQLGGD

**Supplementary Figure S3. Amino acid sequences of Cas9 proteins used in this study.** The protein sequences of the Cas9 orthologs used in this study are shown. Amino acid residues highlighted in bold and underlined have been changed to Alanine to generate catalytically 'dead' Cas9 proteins (dCas9).

**gRNAs for St1Cas9**PRKDC

**GCGTATCCAGCACTTGTGGT**GTTTTTGTACTCTCAAGATTCAATAATCTTGCAGAAGCTACAAAGATAAGGCTTCATGCC  
GAAATCAACACCCTGTCATTTTATGGCAGGGTGT

CARD11

**GATGAAGAGGACGCCTTGTG**GTTTTTGTACTCTCAAGATTCAATAATCTTGCAGAAGCTACAAAGATAAGGCTTCATGCC  
GAAATCAACACCCTGTCATTTTATGGCAGGGTGT

**gRNAs for St3Cas9**PRKDC

**GGCGTATCCAGCACTTGTGGG**GTTTTTAGAGCTGTGTTGTTTGTAAAACAACACAGCGAGTTAAAATAAGGCTTAGTCCGT  
ACTCAACTTGAAAAGGTGGCACCATTTCGGTGT

CARD11

**GGATGAAGAGGACGCCTTGTG**GTTTTTAGAGCTGTGTTGTTTGTAAAACAACACAGCGAGTTAAAATAAGGCTTAGTCCGT  
ACTCAACTTGAAAAGGTGGCACCATTTCGGTGT

**gRNAs for SpCas9**PRKDC

**GGCGTATCCAGCACTTGTGGG**GTTTTTAGAGCTAGAAATAGCAAGTTAAAATAAGGCTAGTCCGTTATCAACTTGAAAAAGT  
GGCACCAGTTCGGTGCTTTTTTTT

CARD11

**GGATGAAGAGGACGCCTTGTG**GTTTTTAGAGCTAGAAATAGCAAGTTAAAATAAGGCTAGTCCGTTATCAACTTGAAAAAGT  
GGCACCAGTTCGGTGCTTTTTTTT

**Supplementary Figure S4. DNA sequences of gRNAs used in this study.** The individual spacers are highlighted in bold.

**Supplementary Table S1. Cas9 orthologs used in this study.**

| <b>Acronym</b> | <b>Organism</b>                   | <b>PAM</b> | <b>Ref</b> |
|----------------|-----------------------------------|------------|------------|
| Sp             | <i>Streptococcus pyogenes</i>     | 5'-NGG     | 9          |
| St1            | <i>Streptococcus thermophilus</i> | 5'-NNAGAAW | 32         |
| St3            | <i>Streptococcus thermophilus</i> | 5'-NGGNG   | 30         |

Supplementary Table S2. Sequencing results for *PRKDC*-specific RGNs

| Nuclease ID                       | OT ID                        | target sequence <sup>1</sup> | mismatches       | closest gene        | region         | hg19 coordinates | empty vector |             |                    | low activity |              |                    |                      | high activity |              |                    |                      |
|-----------------------------------|------------------------------|------------------------------|------------------|---------------------|----------------|------------------|--------------|-------------|--------------------|--------------|--------------|--------------------|----------------------|---------------|--------------|--------------------|----------------------|
|                                   |                              |                              |                  |                     |                |                  | indels       | total       | mutation frequency | indels       | total        | mutation frequency | p-value <sup>2</sup> | indels        | total        | mutation frequency | p-value <sup>2</sup> |
| <b><i>PRKDC</i>-specific RGNs</b> |                              |                              |                  |                     |                |                  |              |             |                    |              |              |                    |                      |               |              |                    |                      |
| SpCas9                            | Target                       | GGCGTATCCAGCAGCTTGTGGTGG     | 0                | <i>PRKDC</i>        | Exon           | chr8:48710914    | 224          | 38887       | 0,58               | <b>4687</b>  | <b>38571</b> | <b>12,15</b>       | <b>0,000</b>         | <b>7101</b>   | <b>30443</b> | <b>23,33</b>       | <b>0,000</b>         |
|                                   | Sp_OT_01                     | AaaGtTCCAGCAGCTTGTGGTGG      | 3                | <i>CASC10</i>       | Intergenic     | chr10:21717537   | 12           | 49453       | 0,02               | 2            | 31125        | 0,01               | 0,096                | 1             | 24940        | 0,00               | 0,073                |
|                                   | Sp_OT_02                     | CtatTACCAGCAGCTTGTGGAGG      | 4                | <i>CGSER1</i>       | Intron         | chr4:92219980    | 5            | 31853       | 0,02               | 15           | 55573        | 0,03               | 0,357                | 4             | 22455        | 0,02               | 1,000                |
|                                   | Sp_OT_03                     | AagGagTCCAGCAGCTTGTGGAGG     | 4                | <i>C17orf51</i>     | Intergenic     | chr17:21409948   | 3            | 17471       | 0,02               | 1            | 24458        | 0,00               | 0,315                | 3             | 30351        | 0,01               | 1,000                |
|                                   | Sp_OT_04                     | AagGagTCCAGCAGCTTGTGGAGG     | 4                | <i>FLJ36000</i>     | Intergenic     | chr17:21958996   | 4            | 31707       | 0,01               | 4            | 39715        | 0,01               | 1,000                | 3             | 23366        | 0,01               | 1,000                |
|                                   | Sp_OT_05                     | CaCtTtTaCAGCAGCTTGTGGAGG     | 4                | <i>LOC389033</i>    | Intergenic     | chr2:130424558   | 3            | 19903       | 0,02               | 3            | 18642        | 0,02               | 1,000                | 1             | 11896        | 0,01               | 1,000                |
|                                   | Sp_OT_06                     | AaaGTATCCAGCAGCTTGTGGAGG     | 3                | <i>LINC01384</i>    | Intron         | chr20:22587913   | 1            | 30259       | 0,00               | 6            | 32989        | 0,02               | 0,127                | <b>10</b>     | <b>23518</b> | <b>0,04</b>        | <b>0,002</b>         |
|                                   | Sp_OT_07                     | GcCGctCCAGCAGCTTGTGGAGG      | 4                | <i>BRD1</i>         | Intron         | chr22:50180357   | 5            | 7611        | 0,07               | <b>15</b>    | <b>8293</b>  | <b>0,18</b>        | <b>0,045</b>         | 2             | 5424         | 0,04               | 0,707                |
|                                   | Sp_OT_08                     | GctGTAGCCAACACTTGTGGTGG      | 4                | <i>AMOTL1</i>       | Intergenic     | chr11:94649052   | 12           | 38733       | 0,03               | 20           | 35226        | 0,06               | 0,111                | <b>27</b>     | <b>34619</b> | <b>0,08</b>        | <b>0,006</b>         |
|                                   | Sp_OT_09                     | CcCaTACCAGCAGCTTGTGGTGG      | 3                | <i>PABPC4L</i>      | Intergenic     | chr4:135380087   | 9            | 38250       | 0,02               | 12           | 44525        | 0,03               | 0,829                | 8             | 45010        | 0,02               | 0,631                |
|                                   | Sp_OT_10                     | TttGTACCAGCAGCTTGTGGTGG      | 4                | <i>LINC01591</i>    | Intergenic     | chr8:136240411   | 5            | 11271       | 0,04               | 3            | 18437        | 0,02               | 0,165                | 4             | 18134        | 0,02               | 0,318                |
|                                   | Sp_OT_11                     | GaCcTgTCCAGCAGCTTGTGGCAG     | 4                | <i>PSMD13</i>       | Intron         | chr11:250126     | 5            | 47957       | 0,01               | 34           | 277657       | 0,01               | 1,000                | 8             | 36716        | 0,02               | 0,263                |
|                                   | Sp_OT_12                     | CtCcTAgCCAGACTTGTGGGAG       | 4                | <i>TMEM45B</i>      | Intergenic     | chr11:129673387  | 19           | 6690        | 0,28               | 7            | 6239         | 0,11               | 0,031                | 18            | 5276         | 0,34               | 1,000                |
|                                   | Sp_OT_13                     | GtaaT-TCCAGCAGCTTGTGGAGG     | 3, del 15        | <i>MYH10</i>        | Intron         | chr17:8419116    | 146          | 34171       | 0,43               | 98           | 21599        | 0,45               | 1,000                | 120           | 30474        | 0,39               | 0,538                |
|                                   | Sp_OT_14                     | GtCaTc-CCAGCAGCTTGTGGAGG     | 3, del 14        | <i>PAFAH2</i>       | Intergenic     | chr1:26269301    | 3            | 22097       | 0,01               | 7            | 27384        | 0,03               | 0,528                | 5             | 46150        | 0,01               | 1,000                |
|                                   | Sp_OT_15                     | TGC-TggCCAGCAGCTTGTGGTGG     | 2, del 17        | <i>EPB41L3</i>      | Intergenic     | chr18:5718306    | 1            | 43393       | 0,00               | 2            | 36822        | 0,01               | 0,597                | <b>6</b>      | <b>28198</b> | <b>0,02</b>        | <b>0,017</b>         |
|                                   | Sp_OT_16                     | CtgGTgTC-AGCAGCTTGTGGTGG     | 3, del 12        | <i>RP2A2</i>        | Intron         | chr11:990375     | 13           | 27774       | 0,05               | 10           | 29611        | 0,03               | 0,533                | 9             | 23668        | 0,04               | 0,675                |
|                                   | Sp_OT_17                     | GGC-aATtCAGCAGCTTGTGGGGG     | 2, del 17        | <i>RM26</i>         | Intergenic     | chr13:79664515   | 47           | 39999       | 0,12               | 32           | 28021        | 0,11               | 1,000                | 33            | 34940        | 0,09               | 0,370                |
|                                   | Sp_OT_18                     | GGC-aATtCAGCAGCTTGTGGGGG     | 2, del 17        | <i>RM26</i>         | Intergenic     | chr13:79669657   | 45           | 42631       | 0,11               | 57           | 46663        | 0,12               | 0,489                | 28            | 25953        | 0,11               | 1,000                |
|                                   | Sp_OT_19                     | GGgGTcTC-AGCAGCTTGTGGGGG     | 2, del 12        | <i>PDE4A</i>        | Intron         | chr19:10540553   | 23           | 32130       | 0,07               | 27           | 32353        | 0,08               | 0,672                | 28            | 25050        | 0,11               | 0,121                |
|                                   | Sp_OT_20                     | ActGT-TgCAGCAGCTTGTGGAGG     | 3, del 15        | <i>SNAP29</i>       | Exon           | chr22:21243551   | 3            | 41052       | 0,01               | <b>13</b>    | <b>41038</b> | <b>0,03</b>        | <b>0,013</b>         | <b>13</b>     | <b>32574</b> | <b>0,04</b>        | <b>0,004</b>         |
|                                   | Sp_OT_21                     | GcCtTA-gCAGCAGCTTGTGGGGG     | 3, del 14        | <i>ANAPC1</i>       | Intergenic     | chr2:112442281   | 53           | 39046       | 0,14               | 53           | 36381        | 0,15               | 0,771                | 29            | 29041        | 0,10               | 0,219                |
|                                   | Sp_OT_22                     | AatGTcTCCAGCAGCTTGTGGTGG     | 4                | <i>CORIN</i>        | Intron         | chr4:47652995    | 35           | 28595       | 0,12               | 38           | 29274        | 0,13               | 0,816                | 30            | 26196        | 0,11               | 0,805                |
|                                   | Sp_OT_23                     | GtgGTtTCCAGCAGCTTGTGGTAG     | 4                | <i>TBX22</i>        | Intergenic     | chrX:79087058    |              | PCR Failure |                    |              | PCR Failure  |                    |                      |               | PCR Failure  |                    |                      |
| Sp_OT_24                          | GtaaT-TCCAGCAGCTTGTGGGAG     | 3, del 15                    | <i>RAH1F</i>     | Intergenic          | chr1:202845889 | 3                | 20052        | 0,01        | 3                  | 24970        | 0,01         | 1,000              | 4                    | 27173         | 0,01         | 1,000              |                      |
| St1Cas9                           | Target                       | GGGTATCCAGCAGCTTGTGGGAGAAA   | 0                | <i>PRKDC</i>        | Exon           | chr8:48710909    | 224          | 38887       | 0,58               | <b>3362</b>  | <b>35995</b> | <b>9,34</b>        | <b>0,000</b>         |               |              |                    |                      |
|                                   | St1_OT_01                    | CttTATttAGCAGCTTGTGGTAGAGAAA | 4                | <i>LINC00669</i>    | Intergenic     | chr18:36515102   | 42           | 28357       | 0,15               | 50           | 35777        | 0,14               | 1,000                |               |              |                    |                      |
|                                   | St1_OT_02                    | TtcTtTCCAGCAGCTTGTGGTAGAGAAA | 4                | <i>SOX2-OT</i>      | Intron         | chr3:180924313   | 3            | 3235        | 0,09               | 10           | 9084         | 0,11               | 1,000                |               |              |                    |                      |
|                                   | St1_OT_03                    | TgaTcaCCATcACTTGTGGTCAGGAAA  | 5                | <i>SORCS1</i>       | Intron         | chr10:108706808  | 1            | 21224       | 0,00               | 7            | 37166        | 0,02               | 0,272                |               |              |                    |                      |
|                                   | St1_OT_04                    | AcATaaCatCACTTGTGGTAGGAAA    | 5                | <i>MGAT4C</i>       | Intergenic     | chr12:86347672   | 9            | 77347       | 0,01               | 4            | 41711        | 0,01               | 1,000                |               |              |                    |                      |
|                                   | St1_OT_05                    | CtGTAgacACcACTTGTGGTTAGGAAA  | 4                | <i>MCR2</i>         | Intron         | chr18:13890178   | 4            | 22065       | 0,02               | 12           | 34146        | 0,04               | 0,311                |               |              |                    |                      |
|                                   | St1_OT_06                    | TaGcATaCAGtACTTGTGGTTAAGAAA  | 4                | <i>BAZ1A</i>        | Intergenic     | chr14:35367791   | 11           | 27203       | 0,04               | 9            | 39675        | 0,02               | 0,255                |               |              |                    |                      |
|                                   | St1_OT_07                    | TttTtTCCAttACTTGTGGTCCAGGAAA | 5                | <i>VWA5B1</i>       | Intergenic     | chr1:20682682    | 3            | 5704        | 0,05               | 6            | 7279         | 0,08               | 0,740                |               |              |                    |                      |
|                                   | St1_OT_08                    | gAGTtCCAGCAGCTTGTGGTAGGAAA   | 4                | <i>LINC01603</i>    | Intergenic     | chr8:70291893    | 4            | 5627        | 0,07               | 8            | 7814         | 0,10               | 0,771                |               |              |                    |                      |
|                                   | St1_OT_09                    | TgGcAgCCAGCAGCTTGTGGTAGGAAA  | 4                | <i>NUBPL</i>        | Intergenic     | chr14:32426712   | 6            | 26641       | 0,02               | 5            | 38117        | 0,01               | 0,377                |               |              |                    |                      |
|                                   | St1_OT_10                    | GgaTATgCAGctCTTGTGGTCTAGAAAT | 5                | <i>MRPL3</i>        | Intergenic     | chr3:131150014   | 11           | 14953       | 0,07               | 5            | 31190        | 0,02               | 0,005                |               |              |                    |                      |
|                                   | St1_OT_11                    | ACTaaTAc-GCACTTGTGGTTCAGGAA  | 3, del 12        | <i>HLF</i>          | Intron         | chr17:53357071   | 4            | 17830       | 0,02               | 4            | 40608        | 0,01               | 1,000                |               |              |                    |                      |
|                                   | St1_OT_12                    | TCaTtT-CAaCACTTGTGGTGTGGAAAG | 3, del 14        | <i>MCHR2-AS1</i>    | Intron         | chr6:100513422   | 8            | 30733       | 0,03               | 7            | 41283        | 0,02               | 0,442                |               |              |                    |                      |
|                                   | St1_OT_13                    | TtaTcTC-AaCACTTGTGGTAAGGAAAG | 4, del 13        | <i>SERPINA13P</i>   | Intergenic     | chr14:95154225   | 2            | 15147       | 0,01               | 2            | 2124         | 0,09               | 0,077                |               |              |                    |                      |
|                                   | St1_OT_14                    | GgGTAg-CAaCACTTGTGGTTAGGAAAG | 3, del 14        | <i>LOC101929413</i> | Intergenic     | chr20:10813238   | 4            | 23752       | 0,02               | 2            | 40044        | 0,00               | 0,204                |               |              |                    |                      |
|                                   | St1_OT_15                    | GgagATCCAGgAgTGTGGTGGGGAAG   | 5                | <i>UBA1</i>         | Intergenic     | chrX:47075905    | 2            | 6650        | 0,03               | 11           | 14019        | 0,08               | 0,246                |               |              |                    |                      |
|                                   | St1_OT_16                    | GgcTtTCCACcAGcGTGGTGTGGAAAG  | 5                | <i>IL33</i>         | Intergenic     | chr9:6125137     | 3            | 5528        | 0,05               | 6            | 8480         | 0,07               | 1,000                |               |              |                    |                      |
|                                   | St1_OT_17                    | AtGTATaCatCAcATGTGGTTCAGGAT  | 4                | <i>CRBM</i>         | Intron         | chr10:35499012   | 1            | 25594       | 0,00               | 3            | 33056        | 0,01               | 0,637                |               |              |                    |                      |
|                                   | St1_OT_18                    | CaGTATaCAGaAtTGTGGTGTAGGAG   | 4                | <i>MDGA2</i>        | Intron         | chr14:47818229   | 0            | 27314       | 0,00               | 5            | 36154        | 0,01               | 0,075                |               |              |                    |                      |
|                                   | St1_OT_19                    | TatgATCC-cCACTTGTGGTTCAGGAAA | 4, del 12        | <i>SUDS3</i>        | Intergenic     | chr12:119091119  | 2            | 20666       | 0,01               | 8            | 50462        | 0,02               | 0,734                |               |              |                    |                      |
|                                   | St1_OT_20                    | TttgAaCCAG-ActTGTGGTGGAGGAG  | 4, del 10        | <i>SORCS3</i>       | Intron         | chr10:106464716  | 11           | 18359       | 0,06               | 6            | 30082        | 0,02               | 0,042                |               |              |                    |                      |
|                                   | St1_OT_21                    | CCtaAttCAG-ActTGTGGTAAAGAAA  | 3, del 10        | <i>MIR1468</i>      | Intergenic     | chrX:63011205    | 14           | 23440       | 0,06               | 17           | 47124        | 0,04               | 1,000                |               |              |                    |                      |
|                                   | St1_OT_22                    | TaaTtCCAG-ActTGTGGTAAAGGAA   | 4, del 10        | <i>RORA</i>         | Intron         | chr15:61403537   | 5            | 28153       | 0,02               | 10           | 39590        | 0,03               | 0,607                |               |              |                    |                      |
|                                   | St1_OT_23                    | CtGAgCCAGC-CTTGTGGTGTGGAAA   | 3, del 9         | <i>CXCR4</i>        | Intergenic     | chr2:137257834   | 3            | 229996      | 0,00               | <b>3</b>     | <b>23553</b> | <b>0,01</b>        | <b>0,013</b>         |               |              |                    |                      |
| St1_OT_24                         | TgGTACCAGtAcCTTGTGGTAGAGAAAG | 4                            | <i>MIR7641-2</i> | Intergenic          | chr4:56953086  | 3                | 23579        | 0,01        | 2                  | 24050        | 0,01         | 0,684              |                      |               |              |                    |                      |





Supplementary Table S3. Sequencing results for *CARD11*-specific RGNs

| Nuclease ID                        | OT ID                      | target sequence <sup>1</sup> | mismatches                  | closest gene                   | hg19 coordinates | empty vector |             |                    | low activity |              |                    |                      | high activity |              |                    |                      |
|------------------------------------|----------------------------|------------------------------|-----------------------------|--------------------------------|------------------|--------------|-------------|--------------------|--------------|--------------|--------------------|----------------------|---------------|--------------|--------------------|----------------------|
|                                    |                            |                              |                             |                                |                  | indels       | total       | mutation frequency | indels       | total        | mutation frequency | p-value <sup>2</sup> | indels        | total        | mutation frequency | p-value <sup>2</sup> |
| <b><i>CARD11</i>-specific RGNs</b> |                            |                              |                             |                                |                  |              |             |                    |              |              |                    |                      |               |              |                    |                      |
| SpCas9                             | Target                     | GGATGAAGAGGACGCCCTGTGGG      | 0                           | <i>CARD11</i> Exon             | chr7:2987359     | 12           | 31050       | 0,04               | <b>3829</b>  | <b>65385</b> | <b>5,86</b>        | <b>0,00</b>          | <b>4241</b>   | <b>41966</b> | <b>10,11</b>       | <b>0,00</b>          |
|                                    | Sp_OT_01                   | GGAcGAAGAGGtCGCCTGTGGG       | 2                           | <i>FOXA1</i> Intron            | chr14:38063708   | 3            | 41570       | 0,01               | <b>412</b>   | <b>34650</b> | <b>1,19</b>        | <b>0,00</b>          | <b>1117</b>   | <b>38987</b> | <b>2,87</b>        | <b>0,00</b>          |
|                                    | Sp_OT_02                   | AcATGtgGAGcAGCCTGTGGG        | 4                           | <i>PTPRB</i> Intron            | chr12:70947248   | 7            | 8726        | 0,08               | 11           | 67916        | 0,02               | 1,00                 | 7             | 38030        | 0,02               | 1,00                 |
|                                    | Sp_OT_03                   | AttgGAAGAGGatGCCTGTAGG       | 5                           | <i>DPH5</i> Intron             | chr1:101481224   | 4            | 33058       | 0,01               | <b>13</b>    | <b>33113</b> | <b>0,04</b>        | <b>0,00</b>          | <b>13</b>     | <b>21429</b> | <b>0,06</b>        | <b>0,05</b>          |
|                                    | Sp_OT_04                   | TtcTGAtGAGGcCGCCTGTGcAG      | 4                           | <i>SEC16B</i> Intergenic       | chr1:177866906   | 5            | 39059       | 0,01               | 2            | 33106        | 0,01               | 0,29                 | 9             | 35652        | 0,03               | 0,46                 |
|                                    | Sp_OT_05                   | TcAgGTAGAGGAaGCCTGTGTCG      | 4                           | <i>ABTB1</i> Intron            | chr3:127396848   | 13           | 45497       | 0,03               | 6            | 19405        | 0,03               | 0,08                 | 1             | 18879        | 0,01               | 1,00                 |
|                                    | Sp_OT_06                   | TATGAAAaAGGAaGCCTGTGGG       | 3                           | <i>SRPK2</i> Intron            | chr7:104892019   | 10           | 76934       | 0,01               | 14           | 45199        | 0,03               | 1,00                 | 5             | 41376        | 0,01               | 0,04                 |
|                                    | Sp_OT_07                   | GGAgGAAGAGGAgCCCTGTGTAG      | 2                           | <i>HIBADH</i> Intergenic       | chr7:27554525    |              | PCR Failure |                    |              | PCR Failure  |                    |                      |               | PCR Failure  |                    |                      |
|                                    | Sp_OT_08                   | CGAgGAAGAGGAaGCCTGTGAG       | 2                           | <i>LINC00642</i> Intergenic    | chr14:90952872   | 3            | 7565        | 0,04               | 8            | 46484        | 0,02               | 1,00                 | 10            | 41792        | 0,02               | 1,00                 |
|                                    | Sp_OT_09                   | TaATGgAaAGGAGcCCCTGTAGG      | 4                           | <i>NEFM</i> Intergenic         | chr8:24660369    | 6            | 37796       | 0,02               | 9            | 27531        | 0,03               | 1,00                 | 6             | 35255        | 0,02               | 0,19                 |
|                                    | Sp_OT_10                   | TcATGAAGATGAaGCCTGTAGG       | 3                           | <i>DTNA</i> Intergenic         | chr18:32487684   | 2            | 9080        | 0,02               | 7            | 53739        | 0,01               | 1,00                 | 7             | 40971        | 0,02               | 1,00                 |
|                                    | Sp_OT_11                   | AGGagAAGAGGACTcCCTGTAGG      | 3                           | <i>ABHD4</i> Intergenic        | chr14:23124178   | 5            | 36747       | 0,01               | <b>19</b>    | <b>29092</b> | <b>0,07</b>        | <b>0,00</b>          | <b>26</b>     | <b>32413</b> | <b>0,08</b>        | <b>0,00</b>          |
|                                    | Sp_OT_12                   | AGcTGA-tAGGACGCCCTGTGTCG     | 2, del 14                   | <i>KHDRBS3</i> Intergenic      | chr8:136462133   | 1            | 12750       | 0,01               | 4            | 19226        | 0,02               | 1,00                 | 4             | 38138        | 0,01               | 0,65                 |
|                                    | Sp_OT_13                   | GGAT-AGGAGGACGCCCTGTAG       | 1, del 16                   | <i>LOC101927577</i> Intergenic | chr2:66951479    | 8            | 33550       | 0,02               | 12           | 34669        | 0,03               | 1,00                 | 8             | 39269        | 0,02               | 0,50                 |
|                                    | Sp_OT_14                   | AtA-GAgTGGAGCCTGTAGG         | 3, del 17                   | <i>LGSN</i> Intergenic         | chr6:63903490    |              | PCR Failure |                    |              | PCR Failure  |                    |                      |               | PCR Failure  |                    |                      |
|                                    | Sp_OT_15                   | TtAgGgAGAGGAaGCCTGTGAG       | 4                           | <i>ADGRF1</i> Intergenic       | chr6:47082815    | 7            | 36825       | 0,02               | 14           | 41067        | 0,03               | 0,57                 | 5             | 40248        | 0,01               | 0,27                 |
|                                    | Sp_OT_16                   | GGAgGTAGAGGATGCCTGTGTAAG     | 3                           | <i>STX11</i> Intergenic        | chr6:144537633   | 11           | 49603       | 0,02               | <b>84</b>    | <b>52271</b> | <b>0,16</b>        | <b>0,00</b>          | <b>130</b>    | <b>33403</b> | <b>0,39</b>        | <b>0,00</b>          |
|                                    | Sp_OT_17                   | TcAgGgAGAGGAaGCCTGTGAG       | 4                           | <i>GRID1</i> Intron            | chr10:87865710   | 2            | 25315       | 0,01               | 1            | 42681        | 0,00               | 1,00                 | 2             | 37912        | 0,01               | 0,56                 |
|                                    | Sp_OT_18                   | TtATGcAGATGAaGCCTGTGAG       | 4                           | <i>LINC00971</i> Intergenic    | chr3:83562980    | 3            | 5115        | 0,06               | 4            | 51800        | 0,01               | 1,00                 | 4             | 42912        | 0,01               | 1,00                 |
|                                    | Sp_OT_19                   | TcATGATAGATGAaGCCTGTGAG      | 4                           | <i>CHRD1</i> Intergenic        | chrX:110081893   | 3            | 9495        | 0,03               | 0            | 28589        | 0,00               | 1,00                 | 4             | 35906        | 0,01               | 0,02                 |
|                                    | Sp_OT_20                   | GtATGAGATGAGcCCTGTGAGG       | 4                           | <i>RSU1</i> Intron             | chr10:16719011   | 5            | 40320       | 0,01               | 5            | 30087        | 0,02               | 1,00                 | 6             | 43230        | 0,01               | 0,75                 |
|                                    | Sp_OT_21                   | TcATGAAAaGAaGCCTGTGTCG       | 4                           | <i>ANK2</i> Intron             | chr4:114110211   | 7            | 6461        | 0,11               | 7            | 40294        | 0,02               | 1,00                 | 9             | 39736        | 0,02               | 1,00                 |
|                                    | Sp_OT_22                   | AaATGAAAGAGGAcCCTGTGAG       | 3                           | <i>LINC01335</i> Intergenic    | chr5:73434648    |              | PCR Failure |                    |              | PCR Failure  |                    |                      |               | PCR Failure  |                    |                      |
|                                    | Sp_OT_23                   | GGA-atAGAGGACGCCCTGTGTAAG    | 2, del 17                   | <i>SCML4</i> Intron            | chr6:108054086   | 11           | 41478       | 0,03               | 9            | 45387        | 0,02               | 0,50                 | 9             | 48415        | 0,02               | 0,66                 |
| Sp_OT_24                           | AGAgcAAGAGGACTcCCTGTGTAAG  | 3                            | <i>MIR7641-2</i> Intergenic | chr6:4322363                   | 10               | 33715        | 0,03        | 1                  | 25682        | 0,00         | 0,47               | 7                    | 36837         | 0,02         | 0,03               |                      |
| St1Cas9                            | Target                     | GATGAAGAGGACGCCCTGTGGGAGAT   | 0                           | <i>CARD11</i> Exon             | chr7:2987354     | 12           | 31050       | 0,04               | <b>4785</b>  | <b>42265</b> | <b>11,32</b>       | <b>0,000</b>         |               |              |                    |                      |
|                                    | St1_OT_01                  | AggcAAGAGGATGCCTGTGTAGAAA    | 4                           | <i>DLG1</i> Intron             | chr3:196969818   | 9            | 29243       | 0,03               | 6            | 38090        | 0,02               | 0,205                |               |              |                    |                      |
|                                    | St1_OT_02                  | AtaGAAGAtGATGCCTGTGTGGAAA    | 4                           | <i>LINC01467</i> Intergenic    | chr14:83571802   | 5            | 30983       | 0,02               | 5            | 47490        | 0,01               | 1,000                |               |              |                    |                      |
|                                    | St1_OT_03                  | AcTGAAttGGAAcCCTGTGTAGAAA    | 4                           | <i>DRG1</i> Intron             | chr22:31819425   | 3            | 23361       | 0,01               | 3            | 34770        | 0,01               | 1,000                |               |              |                    |                      |
|                                    | St1_OT_04                  | TATaAGATGAaGCCTGTGAGAGGAT    | 3                           | <i>VGLL2</i> Intergenic        | chr6:117437944   | 4            | 10707       | 0,04               | 4            | 19115        | 0,02               | 1,000                |               |              |                    |                      |
|                                    | St1_OT_05                  | AATGAAGAGatgCCCTGTGTCAGGAA   | 3                           | <i>TTL4</i> Intergenic         | chr2:219621643   | 0            | 25822       | 0,00               | <b>7</b>     | <b>35292</b> | <b>0,02</b>        | <b>0,024</b>         |               |              |                    |                      |
|                                    | St1_OT_06                  | AtgGAgGAGGACGctTTGTGTGAGGAG  | 4                           | <i>WIPF1</i> Intergenic        | chr2:175557440   |              | PCR Failure |                    |              | PCR Failure  |                    |                      |               |              |                    |                      |
|                                    | St1_OT_07                  | AgTGAAGAGccCCTGTGCAAGAAT     | 4                           | <i>SYNGR1</i> Exon             | chr22:39779459   | 5            | 24766       | 0,02               | 8            | 26840        | 0,03               | 0,585                |               |              |                    |                      |
|                                    | St1_OT_08                  | GATGAAGAAGGAaGCCTGTGAAAGAAC  | 1, ins 12                   | <i>SRRM4</i> Intergenic        | chr12:119365733  | 2            | 22014       | 0,01               | 5            | 25801        | 0,02               | 0,463                |               |              |                    |                      |
|                                    | St1_OT_09                  | AgTGAaAAGGAaGcCTGTGTAAGAAT   | 4                           | <i>CDH9</i> Intergenic         | chr5:26779606    | 4            | 34026       | 0,01               | 3            | 37233        | 0,01               | 0,716                |               |              |                    |                      |
|                                    | St1_OT_10                  | AATGAAAaAGA-GCCTGTGGGAGGAA   | 2, del 9                    | <i>C3orf56</i> Intergenic      | chr3:126876605   | 9            | 9423        | 0,10               | 14           | 9863         | 0,14               | 0,407                |               |              |                    |                      |
|                                    | St1_OT_11                  | TgTGAATAG-AtGCCTGTGcCCAGGAT  | 3, del 11                   | <i>MIR1973</i> Intergenic      | chr4:116779724   | 0            | 18683       | 0,00               | 2            | 21005        | 0,01               | 0,502                |               |              |                    |                      |
|                                    | St1_OT_12                  | GtTgG-GAGGACcCCTGTGcCCAGGAT  | 3, del 15                   | <i>SAMM50</i> Intron           | chr22:44361944   | 7            | 9483        | 0,07               | 9            | 10422        | 0,09               | 0,807                |               |              |                    |                      |
|                                    | St1_OT_13                  | GcaGgAGAGGACGC-TTGTGAGGAAAG  | 3, del 6                    | <i>LINC01399</i> Exon          | chr22:35627030   | 3            | 15718       | 0,02               | 3            | 16550        | 0,02               | 1,000                |               |              |                    |                      |
|                                    | St1_OT_14                  | AATGgAGAGG-tGCCTGTGGGGAAAC   | 2, del 10                   | <i>TEX26</i> Intergenic        | chr13:31573663   | 263          | 24124       | 1,09               | 405          | 42267        | 0,96               | 1,000                |               |              |                    |                      |
|                                    | St1_OT_15                  | AtTGAAAAGAGaGCCTGTGTAGAAC    | 3, ins 11                   | <i>FSHP</i> Intergenic         | chr2:49393909    | 5            | 30414       | 0,02               | 2            | 35053        | 0,01               | 0,262                |               |              |                    |                      |
|                                    | St1_OT_16                  | CtTGAAGAc-ACaCCTGTGCTGGAAG   | 3, del 11                   | <i>GSAP</i> Intron             | chr7:77013931    | 3            | 42627       | 0,01               | 7            | 42172        | 0,02               | 0,224                |               |              |                    |                      |
|                                    | St1_OT_17                  | AcT-AAGAGtACGACTGTGAGAGAAC   | 3, del 17                   | <i>PRDX4</i> Intergenic        | chrX:23635637    | 0            | 20008       | 0,00               | 2            | 32168        | 0,01               | 0,527                |               |              |                    |                      |
|                                    | St1_OT_18                  | TgTGAAGAGGcCAtcCTGTGGGAGAAA  | 4                           | <i>BCAS3</i> Intron            | chr17:59390228   | 4            | 34594       | 0,01               |              | PCR Failure  |                    |                      |               |              |                    |                      |
|                                    | St1_OT_19                  | GcTGAAGAGGAtGC-TTGTGTGAGAAA  | 2, del 6                    | <i>DNMT3A</i> Intron           | chr2:25540417    | 3            | 19235       | 0,02               |              | PCR Failure  |                    |                      |               |              |                    |                      |
|                                    | St1_OT_20                  | AcTGAAGAGGAaGC-TTGTGAGGAAAA  | 2, del 6                    | <i>LINC01571</i> Intergenic    | chr16:51695491   | 5            | 24726       | 0,02               |              | PCR Failure  |                    |                      |               |              |                    |                      |
|                                    | St1_OT_21                  | AATGAA-AGGAgCCTGTGTAGGAAAC   | 2, del 14                   | <i>RPRM</i> Intergenic         | chr2:154276079   | 2            | 23332       | 0,01               |              | PCR Failure  |                    |                      |               |              |                    |                      |
|                                    | St1_OT_22                  | TtTGAAGATGAaCCTGTGGGAGGAT    | 3, ins 9                    | <i>SPATA6L</i> Intergenic      | chr9:4595955     | 8            | 32891       | 0,02               |              | PCR Failure  |                    |                      |               |              |                    |                      |
|                                    | St1_OT_23                  | GcgGAAGAGGA-GcCTGTGTAGGAAAC  | 3, del 9                    | <i>ZC3H12C</i> Exon            | chr11:110035898  | 5            | 6604        | 0,08               |              | PCR Failure  |                    |                      |               |              |                    |                      |
| St1_OT_24                          | AtTGA-GAGGATcTCTGTGGAAGAAT | 3, del 15                    | <i>LOC440390</i> Intergenic | chr16:87140262                 | 3                | 12471        | 0,02        |                    | PCR Failure  |              |                    |                      |               |              |                    |                      |

| Target    | GGATGAAGAGGACGCCTTGTGGGAG                                                       | 0         | CARD11       | Exon       | chr7:2987357    | 12 | 31050 | 0,04 | 2131 | 25153 | 8,47 | 0,000 |
|-----------|---------------------------------------------------------------------------------|-----------|--------------|------------|-----------------|----|-------|------|------|-------|------|-------|
| St3_OT_01 | <b>Att</b> TGgAGAGaACGCCTTGTGGATC                                               | 4         | LOC101927630 | Intergenic | chr7:17684983   | 5  | 33343 | 0,01 | 3    | 47591 | 0,01 | 0,287 |
| St3_OT_02 | G <b>at</b> GT <b>ct</b> GAGG <b>at</b> GCCTTGTGG <b>AA</b> G                   | 4         | GRIA1        | Intron     | chr5:153008828  | 2  | 5913  | 0,03 | 3    | 9270  | 0,03 | 1,000 |
| St3_OT_03 | C <b>ac</b> GAAG <b>at</b> g <b>act</b> c <b>ct</b> TGTGG <b>TT</b>             | 4         | SOS1         | Intron     | chr2:39333929   | 9  | 6410  | 0,14 | 24   | 9164  | 0,26 | 0,114 |
| St3_OT_04 | T <b>at</b> GT <b>at</b> G <b>at</b> G <b>act</b> c <b>ct</b> TGTGG <b>AG</b> G | 4         | MYO3B        | Intron     | chr2:171251698  | 1  | 31680 | 0,00 | 6    | 40737 | 0,01 | 0,146 |
| St3_OT_05 | C <b>ag</b> GAAG <b>g</b> g <b>ct</b> GCCTTGTGG <b>G</b> A                      | 4         | KCNK9        | Intergenic | chr8:140381132  | 1  | 8959  | 0,01 | 7    | 21110 | 0,03 | 0,450 |
| St3_OT_06 | AGATGA <b>ac</b> AG <b>ct</b> c <b>ct</b> TGTGG <b>AG</b> G                     | 3         | LHX5-AS1     | Intergenic | chr12:114036786 | 7  | 26500 | 0,03 | 10   | 42902 | 0,02 | 1,000 |
| St3_OT_07 | T <b>ag</b> GAAG-GG <b>c</b> CGCCTTGTGG <b>G</b> CT                             | 3, del 12 | CACNA1I      | Intron     | chr22:40011069  | 5  | 28372 | 0,02 | 5    | 37384 | 0,01 | 1,000 |
| St3_OT_08 | T <b>ag</b> GAAG <b>tg</b> g <b>ac</b> g <b>ct</b> TGTGG <b>GG</b> C            | 4         | SEPT8        | Intergenic | chr5:132121907  | 91 | 31912 | 0,29 | 115  | 39092 | 0,29 | 0,834 |
| St3_OT_09 | AGAT <b>ct</b> AGAGGA-GCCTTGTGG <b>G</b> AT                                     | 2, del 8  | PRELID2      | Intergenic | chr5:144741267  | 4  | 31859 | 0,01 | 9    | 33392 | 0,03 | 0,269 |
| St3_OT_10 | A <b>ag</b> GA <b>aa</b> AGGA-GCCTTGTGG <b>G</b> CT                             | 3, del 8  | UBASH3B      | 5'UTR      | chr11:122526384 | 4  | 23619 | 0,02 | 7    | 31134 | 0,02 | 0,767 |
| St3_OT_11 | C <b>t</b> AT <b>ca</b> AGAGGA <b>at</b> c <b>ct</b> TGTGG <b>TT</b>            | 4         | RPP21        | Intergenic | chr6:30331958   | 10 | 7992  | 0,13 | 10   | 9132  | 0,11 | 1,000 |
| St3_OT_12 | A <b>act</b> GAAG <b>t</b> GGA-GCCTTGT <b>AG</b> AAG                            | 3, del 8  | LAMA3        | Exon       | chr18:21495363  | 3  | 32144 | 0,01 | 6    | 34363 | 0,02 | 0,510 |
| St3_OT_13 | T <b>at</b> GT <b>ag</b> GAGG <b>ag</b> a <b>ct</b> TGT <b>GA</b> TG            | 4         | DNAJC6       | Intron     | chr1:65865047   | 6  | 39645 | 0,02 | 8    | 42348 | 0,02 | 0,792 |
| St3_OT_14 | G <b>ca</b> GAAG-GG <b>aa</b> GCCTTGTGG <b>AG</b> G                             | 3, del 12 | C10orf11     | Intron     | chr10:77750620  | 3  | 31917 | 0,01 | 7    | 30309 | 0,02 | 0,216 |
| St3_OT_15 | C <b>ca</b> TG <b>aa</b> cAGG <b>ag</b> c <b>ct</b> TGTGG <b>TT</b> C           | 4         | RORA         | Intron     | chr15:61454627  | 9  | 28723 | 0,03 | 11   | 32487 | 0,03 | 1,000 |
| St3_OT_16 | T <b>at</b> GT <b>at</b> G <b>g</b> GGA-GCCTTGTGG <b>AG</b> G                   | 3, del 8  | PTPN3        | Intron     | chr9:112246123  | 6  | 43260 | 0,01 | 7    | 35407 | 0,02 | 0,584 |
| St3_OT_17 | A <b>aat</b> GAAGAG <b>ag</b> t <b>cg</b> c <b>ct</b> TGTGG <b>AG</b> G         | 2, ins 10 | CTTNBP2      | Intron     | chr7:117394240  | 4  | 33195 | 0,01 | 7    | 42586 | 0,02 | 0,765 |
| St3_OT_18 | TGAG <b>G</b> AA <b>aa</b> AGGAC-CCTTGT <b>AG</b> GTG                           | 2, del 7  | MIR8054      | Intergenic | chr11:23242566  | 5  | 37873 | 0,01 | 18   | 53192 | 0,03 | 0,058 |
| St3_OT_19 | C <b>ca</b> TG <b>t</b> AGAG- <b>ag</b> GCCTTGTGG <b>AG</b> G                   | 3, del 10 | PLS1         | Intron     | chr3:142404412  | 8  | 24561 | 0,03 | 4    | 36289 | 0,01 | 0,079 |
| St3_OT_20 | GGATG <b>ag</b> G <b>ag</b> GA-GCCTTGT <b>GG</b> TG                             | 2, del 8  | NKAIN2       | Intron     | chr6:124316384  | 8  | 10467 | 0,08 | 16   | 13983 | 0,11 | 0,413 |
| St3_OT_21 | G <b>aa</b> GAAG <b>C</b> AGGA <b>a</b> c <b>ct</b> TGT <b>AG</b> GGG           | 3, ins 12 | ADGRF5       | Intron     | chr6:46903615   | 35 | 36624 | 0,10 | 45   | 50773 | 0,09 | 1,000 |
| St3_OT_22 | T <b>at</b> GT <b>aa</b> <b>aa</b> AGGA-GCCTTGTGG <b>AG</b> C                   | 3, del 8  | C3orf56      | Intergenic | chr3:126876608  | 3  | 12510 | 0,02 | 9    | 36707 | 0,02 | 1,000 |
| St3_OT_23 | AGATG <b>ca</b> AG <b>AG</b> G <b>aa</b> c <b>ct</b> TGT <b>GG</b> AG           | 2, ins 11 | PABPC4L      | Intergenic | chr4:134772265  | 2  | 6293  | 0,03 | 9    | 8865  | 0,10 | 0,137 |
| St3_OT_24 | C <b>tg</b> TGAAG <b>G</b> AGG <b>act</b> c <b>ct</b> TGTGG <b>GG</b> C         | 3, ins 12 | PSD4         | Intron     | chr2:113953582  | 33 | 15703 | 0,21 | 18   | 5762  | 0,31 | 1,000 |

<sup>1</sup> PAM sequence is underlined. Differences to the target sequence are highlighted as follows: mismatches (lower-case bold), insertions (bold-italics), deletions (-).

<sup>2</sup> Statistically significant indel events are highlighted in bold.

Supplementary Table S4. Oligonucleotides used in this study

| Primer ID | Sequence                                   | Target       | Application          |
|-----------|--------------------------------------------|--------------|----------------------|
| #13       | TCACGGGGATTTCCAAGTCTC                      | GFP reporter | T7EI assay           |
| #77       | AAGTCGTGCTGCTTCATGTGGT                     | GFP reporter | T7EI assay           |
| #2397     | TCAACCGCAGGATTTTCCT                        | CARD11       | T7EI assay           |
| #2398     | CCTGCTCGGTTGATCTTGA                        | CARD11       | T7EI assay           |
| #2187     | GGCCTCTTAAGCAACATGACCTAC                   | PRKDC        | T7EI assay           |
| #2188     | CATGCACTGCACACACTAACGCG                    | PRKDC        | T7EI assay           |
| #1904     | ACACCGGATGAAGAGGACGCCTTGTG                 | CARD11       | gRNA cloning         |
| #1905     | AAAACACAAGGCGTCTCTTCATCCG                  | CARD11       | gRNA cloning         |
| #2059     | ACACCGATGAAGAGGACGCCTTGTGG                 | CARD11       | gRNA cloning         |
| #2060     | AAAACCACAAGGCGTCTCTTCATCG                  | CARD11       | gRNA cloning         |
| #2201     | ACACCGATGAAGAGGACGCCTTGTG                  | CARD11       | gRNA cloning         |
| #2202     | AAAACACAAGGCGTCTCTTCATCG                   | CARD11       | gRNA cloning         |
| #2203     | ACACCGTGAAGAGGACGCCTTGTG                   | CARD11       | gRNA cloning         |
| #2204     | AAAACACAAGGCGTCTCTTCACG                    | CARD11       | gRNA cloning         |
| #2205     | ACACCGGAAGAGGACGCCTTGTG                    | CARD11       | gRNA cloning         |
| #2206     | AAAACACAAGGCGTCTCTTCCG                     | CARD11       | gRNA cloning         |
| #2207     | ACACCGTGAAGAGGACGCCTTGTGG                  | CARD11       | gRNA cloning         |
| #2208     | AAAACCACAAGGCGTCTCTCACG                    | CARD11       | gRNA cloning         |
| #2209     | ACACCGGAAGAGGACGCCTTGTGG                   | CARD11       | gRNA cloning         |
| #2210     | AAAACCACAAGGCGTCTCTTCCG                    | CARD11       | gRNA cloning         |
| #2211     | ACACCGAAGAGGACGCCTTGTGG                    | CARD11       | gRNA cloning         |
| #2212     | AAAACCACAAGGCGTCTCTTCG                     | CARD11       | gRNA cloning         |
| #1906     | ACACCGCGTATCCAGCACTTGTGGG                  | PRKDC        | gRNA cloning         |
| #1907     | AAAACCCACAAGTGCTGGATACGCCG                 | PRKDC        | gRNA cloning         |
| #2061     | ACACCGCGTATCCAGCACTTGTGGTG                 | PRKDC        | gRNA cloning         |
| #2062     | AAAACACCACAAGTGCTGGATACGCCG                | PRKDC        | gRNA cloning         |
| #2189     | ACACCGCGTATCCAGCACTTGTGGG                  | PRKDC        | gRNA cloning         |
| #2190     | AAAACCCACAAGTGCTGGATACGCCG                 | PRKDC        | gRNA cloning         |
| #2191     | ACACCGTATCCAGCACTTGTGGG                    | PRKDC        | gRNA cloning         |
| #2192     | AAAACCCACAAGTGCTGGATACG                    | PRKDC        | gRNA cloning         |
| #2193     | ACACCGGTATCCAGCACTTGTGGG                   | PRKDC        | gRNA cloning         |
| #2194     | AAAACCCACAAGTGCTGGATACCG                   | PRKDC        | gRNA cloning         |
| #2195     | ACACCGTATCCAGCACTTGTGGTG                   | PRKDC        | gRNA cloning         |
| #2196     | AAAACACCACAAGTGCTGGATACG                   | PRKDC        | gRNA cloning         |
| #2197     | ACACCGGTATCCAGCACTTGTGGTG                  | PRKDC        | gRNA cloning         |
| #2198     | AAAACACCACAAGTGCTGGATACCG                  | PRKDC        | gRNA cloning         |
| #2199     | ACACCGATCCAGCACTTGTGGTG                    | PRKDC        | gRNA cloning         |
| #2200     | AAAACACCACAAGTGCTGGATCG                    | PRKDC        | gRNA cloning         |
| #1898     | TAACCCGGGGATGAAGAGGACGCCTTGTGGAGAATA       | CARD11       | GFP reporter cloning |
| #1899     | CCGGTATTCTCCACAAAGGCGTCTCTTCATCCCCGGGTTAAT | CARD11       | GFP reporter cloning |
| #1900     | TAACCCGGGGCGTATCCAGCACTTGTGGTGAGAAAA       | PRKDC        | GFP reporter cloning |
| #1901     | CCGGTTTTCTCCACCAAGTGCTGGATACGCCCGGGTTAAT   | PRKDC        | GFP reporter cloning |

Supplementary Table S5. Sequencing primers for *PRKDC*-specific RGNs.

| Nuclease ID | OT ID            | Closest Gene                  | PCR Primer Left                       | PCR Primer Right                  |
|-------------|------------------|-------------------------------|---------------------------------------|-----------------------------------|
| SpCas9      | Target           | <i>PRKDC</i>                  | CACCAACCTCTTTGTGCATGAGGC              | CCTGGTGTTTGGTGGTAAAGTGGTAG        |
|             | Sp_OT_01         | <i>CASC10</i>                 | TACAGGGTCTCACTCTGTGGCC                | GCAAGACCCCGCCTAAAAACG             |
|             | Sp_OT_02         | <i>CCSER1</i>                 | GTTGAGCATGGAGGCATCCTG                 | GGGTAGAGGTTCCAAAGTATTTGGCC        |
|             | Sp_OT_03         | <i>C17orf51</i>               | GGAAATTGCCTAAGCAGTGTGG                | CCAGGGGACACAAACACTTAGC            |
|             | Sp_OT_04         | <i>FLJ36000</i>               | GGGAAATTACCCTAACAGGGTGTG              | CAGGGGACACAAACCGTTAGCA            |
|             | Sp_OT_05         | <i>LOC389033</i>              | AGTCTTTGTGTGAACGCTCATGCC              | GGTGACAGAACAGACTCCATCTC           |
|             | Sp_OT_06         | <i>LINC01384</i>              | TTGCAACCAGACCTGCCAGGTA                | TCTGGCACTAGAGAAGGTGGC             |
|             | Sp_OT_07         | <i>BRD1</i>                   | AGTACTGCATTTACCACAGGGGC               | AACTCCTGGCCTCTGACTCC              |
|             | Sp_OT_08         | <i>AMOTL1</i>                 | GCTGCAGTTGCTGCATTTAAGGAG              | GGCTAGTTCAGTTTCTGTTTGAATTCAC      |
|             | Sp_OT_09         | <i>PABPC4L</i>                | CACCCAGGCTTCAACATAAATGC               | ACATGCTCTTCTCACTTGGCCAC           |
|             | Sp_OT_10         | <i>LINC01591</i>              | GAACACATTCCAAAGCTCTGGGG               | GTGCCACCACACCCAGCTAA              |
|             | Sp_OT_11         | <i>PSMD13</i>                 | ACGCTTCTGCAAGATATGCATCATCTCTTC        | GGTGACACTCAGAAAGGAGATGG           |
|             | Sp_OT_12         | <i>TMEM45B</i>                | CCCATTCTGCCTGACACCA                   | TACTGTGCCTCCCACACAGC              |
|             | Sp_OT_13         | <i>MYH10</i>                  | CTACAGGTGTGCCACCACATG                 | GCACAAAGAACCAACTAGGGCAG           |
|             | Sp_OT_14         | <i>PAFAH2</i>                 | CACTGAAGCCTTGAATCTCTGGG               | AGGCGTGCAGGGAAGGTTCTCTTA          |
|             | Sp_OT_15         | <i>EPB41L3</i>                | TCTGTAATGTGACCCGGGTGACT               | TGGGCATGGCTATCTGGAAACC            |
|             | Sp_OT_16         | <i>AP2A2</i>                  | CCAGGACCTCAAATCTGCACAAC               | AAGTTGAGGGGGACAGGGAC              |
|             | Sp_OT_17         | <i>RBM26</i>                  | GAGTTTTCTCCAGTTTCTCCACAG              | CACTTGGCACCAGAAAGTGGTATC          |
|             | Sp_OT_18         | <i>RBM26</i>                  | TTTGCTTAAGCTACATTTCTAGTTGCCTGC        | GCTGTTATATGCCATTCATAGTAGTAGGG     |
|             | Sp_OT_19         | <i>PDE4A</i>                  | CAGAAATCCCCACACCCACA                  | AGACTGCTTAGCAGCTGGAGAG            |
|             | Sp_OT_20         | <i>SNAP29</i>                 | ACAGAAAGCTCACCTPGCCTATGG              | GAGCCACAAGGCCCTTGTCT              |
|             | Sp_OT_21         | <i>ANAPC1</i>                 | TAAACTGTATGTAACAAACGGGTGTTGTGAAG      | GGCCAGAAAACATAAATATCATACCAGGCAC   |
|             | Sp_OT_22         | <i>CORIN</i>                  | CATATCGGATTTGCACAATTCATCCACAC         | GCTCCCTCAGAATTTCTAACAAAGTTATTGAGT |
|             | Sp_OT_23         | <i>TBX22</i>                  | CTCTGGACAGTGGTTATGGCATAG              | GTGCAAGGTTCCAGCATGCTTATG          |
| Sp_OT_24    | <i>RAB1F</i>     | TATTTCTAAGCTCTGTGGGCTGAGG     | ACTGCAGCCTCAACCTCCCA                  |                                   |
| St1Cas9     | Target           | <i>PRKDC</i>                  | CACCAACCTCTTTGTGCATGAGGC              | CCTGGTGTTTGGTGGTAAAGTGGTAG        |
|             | St1_OT_01        | <i>LINC00669</i>              | GAACCCAGCCTATCCTGGTTA                 | CATGTTGGAATCGTTTCTGTGTTGGGTAG     |
|             | St1_OT_02        | <i>SOX2-OT</i>                | GTCCCCATTTGAGAGGGTCTG                 | CAGCCAGTTCCTCATTCATGGAC           |
|             | St1_OT_03        | <i>SORCS1</i>                 | GCAATAATAGTTTGCAGATTTCCCCAGGC         | GCATGGCATACAGGTAGGCTAAG           |
|             | St1_OT_04        | <i>MGAT4C</i>                 | GATGGAACACAGGCATACACACAC              | CAAGTAGCACATTTAGGTCATGACTAATGAG   |
|             | St1_OT_05        | <i>MCR2</i>                   | GGCCACAGTGTGCTAATCTATC                | GGCTCCAAAATGATTAATCTTAGCCGCTCC    |
|             | St1_OT_06        | <i>BAZ1A</i>                  | GACCTAGCTGGTCTCAGATTC                 | GGCACTGTCAAGGGTAATGCA             |
|             | St1_OT_07        | <i>VMA5B1</i>                 | AGGCAGAGAGTCTGGGACTGT                 | TCTTGCTCCAGGCTCCAGG               |
|             | St1_OT_08        | <i>LINC01603</i>              | CCAAAGTGTGGGATTACAGGAG                | CCAGGGAGCTGAAAGAGAGATC            |
|             | St1_OT_09        | <i>NUBPL</i>                  | TGTTCCAGGCCACAGCATGTCAG               | CCAGCTTCAATATCCGCCAGCCC           |
|             | St1_OT_10        | <i>MRPL3</i>                  | GGGATTCGGGGAGGATGAT                   | ACACAGGGCAGAACTCAGCTGG            |
|             | St1_OT_11        | <i>HLF</i>                    | TGGTGGGGGGAATGGAGAA                   | AACCGAGTGAGACCCCATCTCTA           |
|             | St1_OT_12        | <i>MCHR2-AS1</i>              | GATCTCGAATCCCAAGCTCAAG                | GGAAAGCCTCTGGCCTTCACTTCT          |
|             | St1_OT_13        | <i>SERPINA13P</i>             | TGGATTACAGATGTGAGCCACTGC              | GGTGACAGAGCAAGACTCCCTCAA          |
|             | St1_OT_14        | <i>LOC101929413</i>           | TGCACTGAAACCAGCCTCCATG                | GGCTCTGTGCCCTTCTATATCC            |
|             | St1_OT_15        | <i>UBA1</i>                   | GTAAAATGGAATGAGGTGGAGGGG              | TCTAGAGTACCCTAGACACTCCAC          |
|             | St1_OT_16        | <i>IL33</i>                   | CTCAAATACAGCATCTGCTGCC                | GCAGAGAAAGCTAAATTTGCTGCC          |
|             | St1_OT_17        | <i>CREM</i>                   | CTGCCCTTGGAGTAGATCACCC                | CCATTGTTCTGGCTAGGAAGCA            |
|             | St1_OT_18        | <i>MDGA2</i>                  | TTCGTTCACTCAAGTAGGCTCTAGG             | GAGGGAGTTAGTTTGCAGTGGAG           |
|             | St1_OT_19        | <i>SUDS3</i>                  | GTTGGGAAGAGAGAAAGAACTTACATTCTGTG      | GCATTCCATAGAGCTGTTCTTCTGTAATATTG  |
|             | St1_OT_20        | <i>SORCS3</i>                 | CCAAGAATTGGTCTCCACCATAAAAATACAAATGACT | CCAGCCATACCAACTCAATTTGCTGAG       |
|             | St1_OT_21        | <i>MIR1468</i>                | CGGTAGGGCTTGCAGGAAATG                 | CTGGGTTAGATTCTTGGTCCAC            |
|             | St1_OT_22        | <i>RORA</i>                   | CCAGAGAAGAAATGTATAGCTTACCCTCA         | GAACAGTTACCCTCAAGAGCCG            |
|             | St1_OT_23        | <i>CXCR4</i>                  | CAGTCTTGTGCTCCCCCAT                   | AGAGTGAGACTCTATCTGTCTCGC          |
| St1_OT_24   | <i>MIR7641-2</i> | CCCCATCAATGCCACGTGGT          | CCAGATCACACCCACACACTC                 |                                   |
| St3Cas9     | Target           | <i>PRKDC</i>                  | CACCAACCTCTTTGTGCATGAGGC              | CCTGGTGTTTGGTGGTAAAGTGGTAG        |
|             | St3_OT_01        | <i>CCSER1</i>                 | TTTGTGAGCATGGAGGCATCCTG               | TCACCAGTTACAGATGCTGCTGC           |
|             | St3_OT_02        | <i>LOC101927845</i>           | TCATCTCCAGGCCAGCTGT                   | GTGGGGATCAGATGTGTTTCCAG           |
|             | St3_OT_03        | <i>PSMB7</i>                  | CTTGTGCTGCACCGAAGAGCAAT               | GCTCTGTGATCTTTGGGGGATC            |
|             | St3_OT_04        | <i>LY86</i>                   | CGGAGAGCAAGCAATCAGTAAGTG              | GCCTCATCTCAATTTCTGTCTGG           |
|             | St3_OT_05        | <i>ACO1</i>                   | TTATCTCTGTGGCAGAGCTCCTCC              | ACAGGCTTCAATTTTGGGAAGGTGG         |
|             | St3_OT_06        | <i>ZCWPW2</i>                 | CTGATTTGCTGCAGTCTCAGACC               | GGAGTGGAGATTGCTGAGGC              |
|             | St3_OT_07        | <i>TMEM108</i>                | CTCTTTTGCCTTGACTCCAAGAAAGCTC          | CTGTGGTAAGCTCCAGACATGC            |
|             | St3_OT_08        | <i>SLC16A7</i>                | TGCAGTAACTAACCTGACATCTCAATGCC         | CATCAGGTGCCACTTTCATCTAATGTC       |
|             | St3_OT_09        | <i>FLT1</i>                   | CCCAGCCAGACCTTGGCCAAT                 | GATCGTGCCACTGCCTCCA               |
|             | St3_OT_10        | <i>ADAMTSL3</i>               | ACAGTCTGCTCCGGCACAGGACTT              | AAGAATGGCAGCAGGTAGGGC             |
|             | St3_OT_11        | <i>KCNU1</i>                  | GCCTCCCATTAAGCTGTAGTTGC               | GGCAGTAAGAGGAGTTGAATACG           |
|             | St3_OT_12        | <i>PITCHD1</i>                | GACTTGTGCATATGCTCTCTGGGG              | GGGGCTGTGATTTTAGTTTCTGTGC         |
|             | St3_OT_13        | <i>MLH3</i>                   | TGGACTATATCCGATGCTTCTGGG              | GGGGAAAAGAGGGAGTCTGTG             |
|             | St3_OT_14        | <i>STK24</i>                  | GCCTCACACTGATGAGCCCT                  | TGGCTTTAACCCCGAGGTC               |
|             | St3_OT_15        | <i>MECOM</i>                  | TTACAGCCACCTAGAGTAACCAGC              | TTAGGGAAAGTGGCAGGCACC             |
|             | St3_OT_16        | <i>LINC00968</i>              | CACAAGATTCTGTGCACTTCCAGG              | GCAAGAGGTAGCAGAAGTTGTATGGATAG     |
|             | St3_OT_17        | <i>RIMBP2</i>                 | GTAARACACAAGCCATTTAAAGAAAGAGGGTC      | TTAGGCCGAGACAGTTAGTCTTGG          |
|             | St3_OT_18        | <i>JARID2</i>                 | TGATTAGCTCCTTGCAGGGAC                 | GCTAGCCGAAGGGGAGACTGA             |
|             | St3_OT_19        | <i>PARD3B</i>                 | AAGGAGTCAAGTAACTTTGTGGC               | GCCTCTGCTTAAAGCCTCC               |
|             | St3_OT_20        | <i>AGBL4</i>                  | CTAGTACCTGGGGAAGAGAG                  | GGGATGGATAACCAATTTCCCATG          |
|             | St3_OT_21        | <i>TSNARE1</i>                | ACAGCCGGTTAGCTGCAGA                   | CTTTCTGCACACTTTCGGCGGG            |
|             | St3_OT_22        | <i>GFRA1</i>                  | CCCCGTAGCAACGCCCTAT                   | ATGCACCTTCCAACACTCCCCC            |
|             | St3_OT_23        | <i>MYLK4</i>                  | CAGCAATTACCTCCCCTGCC                  | CCAGCCCTCAACAGAAATTCAC            |
| St3_OT_24   | <i>CCDC171</i>   | TTTTAACTTGACTATTCTCATCCCCACCC | ACTGAGGCCTTCTCAGGGAC                  |                                   |

Supplementary Table S6. Sequencing primers for *CARD11*-specific RGNs.

| Nuclease ID | OT ID            | Closest Gene                   | PCR Primer Left                     | PCR Primer Right                     |
|-------------|------------------|--------------------------------|-------------------------------------|--------------------------------------|
| SpCas9      | Target           | <i>CARD11</i>                  | TCTAGAGGTCACCTCCAGAGGAGTT           | GTTACCTGCTCGGTGTGATCTTGG             |
|             | Sp_OT_01         | <i>FOXA1</i>                   | GGAAACTCCGGCTTTGAAAACAG             | AGGAGCACACTTCTCCCAAATAG              |
|             | Sp_OT_02         | <i>PTPRB</i>                   | CTCCCATTTGTAGTGAACCCACTT            | GCAGTGCCAAAACACACAGCAG               |
|             | Sp_OT_03         | <i>DPH5</i>                    | GCCGAGGTTGGTTCATGAGG                | GCAGCAGGGAGAATAGATTTAGC              |
|             | Sp_OT_04         | <i>SEC16B</i>                  | CCATTGCTCCCAATTATGAGGAGG            | ATGGCCCTGGGCAGGATCAA                 |
|             | Sp_OT_05         | <i>ABTB1</i>                   | CAGGGATCTGCAGCACCACA                | GATGGCACACAACCTGTGCTG                |
|             | Sp_OT_06         | <i>SRPK2</i>                   | TCCTGGGGTCAAGCTATGCTC               | TGGGCCAGTATGCAAAAAGGAC               |
|             | Sp_OT_07         | <i>HIBADH</i>                  | CCCTCTGAGGCCTCACACAT                | CTGGGAAGTGTCCAGGAGAGC                |
|             | Sp_OT_08         | <i>LINC00642</i>               | CAAAGAGATCCTTGGGGAATGAGC            | TATGACCTTGGGGATCTCTCTG               |
|             | Sp_OT_09         | <i>NEFM</i>                    | GGAGATGAAGGAATTACCCATGGG            | GCAGAGACTCTTCCAACAGGAC               |
|             | Sp_OT_10         | <i>DTNA</i>                    | ATCCTCACAATACCCATTTTAGGAGGGTGGTAATA | TTTTCCACCACAAAAGAGAGCTCCC            |
|             | Sp_OT_11         | <i>ABHD4</i>                   | GGAGTTTGAAGAAGGAGGAGAGAC            | TTCAAGGTGGAGTGTCTCTFGG               |
|             | Sp_OT_12         | <i>KHDRBS3</i>                 | CTTTTGTGGAGGATGCGATGTGC             | CCCTGCCATCTTTCTGCTTCATC              |
|             | Sp_OT_13         | <i>LOC101927577</i>            | GCAGAAGTACTTGACGGCATGAC             | CCAGACATAGGCCGTAGGAAC                |
|             | Sp_OT_14         | <i>LGSN</i>                    | CATGGCCCTGCCTAGGGTA                 | GGCCACAAGAGCAAACTCCATC               |
|             | Sp_OT_15         | <i>ADGRF1</i>                  | CAGGAGGTAAGTGAAGCATAGG              | GAGAGTGTGTTGAGGGTTTTGG               |
|             | Sp_OT_16         | <i>STX11</i>                   | AAACCTAAAGCTACCAGGAGTGGG            | GTGTCTTCACTGCCGAGC                   |
|             | Sp_OT_17         | <i>GRID1</i>                   | CATGTGTCTAACTGGCCTGGG               | GCAAAGGGTCAAGGAGGACA                 |
|             | Sp_OT_18         | <i>LINC00971</i>               | CAAGAGTGTGGCCGAACACAG               | GCCTGCAAGTCTTTTGTGGGG                |
|             | Sp_OT_19         | <i>CHRD1</i>                   | GAAACCAGGCCTTCCCTTCTAG              | AAAGTCAGGGGTGGGGGAG                  |
|             | Sp_OT_20         | <i>RSU1</i>                    | GAATCAGGGTGAATGCAGGAAGC             | GTCTGCGCAGTTTAAAGAAGCTGTCTC          |
|             | Sp_OT_21         | <i>ANK2</i>                    | GGTATCAATTTCAAGTATGCTGAGACACAC      | GAGTACCTGGTGAATTAAGCAAACTCC          |
|             | Sp_OT_22         | <i>LINC01335</i>               | GGCTGCTTGGAACTTTTGTAGGTC            | CTCCCTCCCAAGTATACT                   |
|             | Sp_OT_23         | <i>SCML4</i>                   | CGAAGTGGTGGACATCCT                  | CAGCAGGACTGAGTTTCCAATGAG             |
| Sp_OT_24    | <i>MIR7641-2</i> | AGTAGGTTAAGTTACTTGGCTCCCAGTTTG | ATGGAAAGTGACATCCAGCCACC             |                                      |
| St1Cas9     | Target           | <i>CARD11</i>                  | TCTAGAGGTCACCTCCAGAGGAGTT           | GTTACCTGCTCGGTGTGATCTTGG             |
|             | St1_OT_01        | <i>DLG1</i>                    | TGCCGTGTAATCTCAGCACTTTGGG           | GGGAGGACACAGAAACAGGAAC               |
|             | St1_OT_02        | <i>LINC01467</i>               | CCACAGAGTTTGTATAACCAAAGTACACC       | CACCTGTGTCATGTTTTGTGCTG              |
|             | St1_OT_03        | <i>DRG1</i>                    | GATCAGCCACTGCACCTTAG                | GCTGGATGCTGAAACTGTGAAGAG             |
|             | St1_OT_04        | <i>VGLL2</i>                   | GTGCAGCAAACCTACCATGGCAG             | GCCTGCAATGGCACTAGATTTTCC             |
|             | St1_OT_05        | <i>TLL4</i>                    | GTGCAGGCTATTTCTGGAGTAGTG            | AACTTTCGCAACCTGCACTGTAG              |
|             | St1_OT_06        | <i>WIPF1</i>                   | TCAAGTTCACAAAGGATGGAACCC            | CACCTGAGATGGGAAAAGAGGAG              |
|             | St1_OT_07        | <i>SYNR1</i>                   | TGAAAACACCAGCACTGGGC                | ACACAGGCAAGAGCCCTGA                  |
|             | St1_OT_08        | <i>SRRM4</i>                   | CTATTCAGGCTCATGCCATACC              | CGGGGGATAGAGGATTCAGG                 |
|             | St1_OT_09        | <i>CDH9</i>                    | CACAGGGAATGCATATGGTGCT              | GGCCCTCTGTTTCACTGAAACGTC             |
|             | St1_OT_10        | <i>C3orf56</i>                 | CTGAAGGAGTCTTCCACCGCC               | TGTGGACACGAGTGGGTTGG                 |
|             | St1_OT_11        | <i>MIR1973</i>                 | CCCATGCTGTTCTCTGTATAGTG             | GACCTCTCTGGGCTCTTAACTC               |
|             | St1_OT_12        | <i>SAMM50</i>                  | CTCAGCCTCCTGAGTAGCCA                | CCAGGAATCCCACTTCCAGG                 |
|             | St1_OT_13        | <i>LINC01399</i>               | GGAAACCAGTGGGAGGTGAT                | GGCTGTTTACCTCTGTATTTGGTCC            |
|             | St1_OT_14        | <i>TEX26</i>                   | GAGGAACAGATGGATAGAGAGGC             | GTAAAATGAGGTGGTTGGACCAGG             |
|             | St1_OT_15        | <i>FSHR</i>                    | GGCATGAGGAGGGAAGATGG                | CCCAGAGAGATTTAGGACTGGAAG             |
|             | St1_OT_16        | <i>GSAP</i>                    | CCAGCAGCACATTTCCCTAATC              | CAGCTCTGCAAAAGCACTCAAGG              |
|             | St1_OT_17        | <i>PRDX4</i>                   | GGTCTTTCTTCTCTGCAGGC                | CCCTTTGCCACAACCATTGAC                |
|             | St1_OT_18        | <i>BCAS3</i>                   | CTAACTTTGTACTGGCACTGGG              | AGGAAGCCATCGGTATTCTGAG               |
|             | St1_OT_19        | <i>DNMT3A</i>                  | TCGTGAAAGCAGACTTGTGACAGC            | CTTTGTCTCAGCTGTGCCAAGTG              |
|             | St1_OT_20        | <i>LINC01571</i>               | CTCAGTGGCTCCCTTCTATG                | GAGCATAAGTCCAGGAGGAGG                |
|             | St1_OT_21        | <i>RPRM</i>                    | CTCCGTGATTCACCTATTTAACATTCAAAAATGGC | CACCTAGTTTCCCAAGTATAGC               |
|             | St1_OT_22        | <i>SPATA6L</i>                 | ACTACTAAACAGGAGTCAAACTGGTGGC        | CATACTTACTGGGCAATGAGACC              |
|             | St1_OT_23        | <i>ZC3H12C</i>                 | CGACCCACAGCTAGAGGAGA                | GAGATGCTGTCTATTTCTCGTGC              |
| St1_OT_24   | <i>LOC440390</i> | GACCTCAGCACTATGAGGAC           | GGCAGCCTTCTGAGAGAGCTA               |                                      |
| St3Cas9     | Target           | <i>CARD11</i>                  | TCTAGAGGTCACCTCCAGAGGAGTT           | GTTACCTGCTCGGTGTGATCTTGG             |
|             | St3_OT_01        | <i>LOC101927630</i>            | GGATGAAACAAATATAAGAGGTTGGAGGGG      | GCAGAGCAGTAACCTTCACTCGGTAAGATC       |
|             | St3_OT_02        | <i>GRIA1</i>                   | CCTGGATGGTTTGCATGCCCC               | TTCCACCTGCCTTCTTCTCAC                |
|             | St3_OT_03        | <i>SOS1</i>                    | CCCATGTATATATCTCCACTCCCAAC          | CAGTAAGACAAAAGAAAACAATTCAGAAACACCCC  |
|             | St3_OT_04        | <i>MYO3B</i>                   | CTTTAGTGTGGAGTCCAGGAGCATG           | GACCATCACAATAGATCATCTGCC             |
|             | St3_OT_05        | <i>KNKN9</i>                   | GAGTCCCTGTATCCACAGTGA               | ACTGAGCTCAAGGAGTGTTTCCC              |
|             | St3_OT_06        | <i>LHX5-AS1</i>                | GATCTTTCATGAGCTTGGCTGGCT            | GACAAGCAGCAAGATCTGCAGAG              |
|             | St3_OT_07        | <i>CACNA1I</i>                 | CAGGAGGTAGTGGGAGGTT                 | CAGGCATAAGCACCACGTCTC                |
|             | St3_OT_08        | <i>SEPT8</i>                   | TTGGGATTTCACTGGGCCAC                | GGGAAGTGGAGAAGGTTGAACG               |
|             | St3_OT_09        | <i>PRELID2</i>                 | TCCCAGGTAGGAGGACAGCT                | GAGACAGACTGGTATGTAAGGGGC             |
|             | St3_OT_10        | <i>UBASH3B</i>                 | GGATCCTCCGTCCAAGTAG                 | TGAGGCCACAGGAGCCAGAA                 |
|             | St3_OT_11        | <i>RPP21</i>                   | CAACTGGCAATGTTGGGAACCG              | GATGGATCCACAATGGAGTACAG              |
|             | St3_OT_12        | <i>LAMA3</i>                   | CAGCTTCCCAGTGCACATAAGTTTC           | CAGGACTGCCAGTGTGCATG                 |
|             | St3_OT_13        | <i>DNAJC6</i>                  | CTGCTTCAGAAAGTTGTTGTGATAAGCCC       | GGCAAGTCTGAGCCTCAGTTTTC              |
|             | St3_OT_14        | <i>C10orf11</i>                | CACCTTCACTTTATGGAGGAGGAG            | AGAGGAAATGGTCCAGTTTGGTTAAGTGTG       |
|             | St3_OT_15        | <i>RORA</i>                    | AATGTCAGGGCTAAAAGAGAGGGC            | GGTAACCACATGATCTGGTCCCTC             |
|             | St3_OT_16        | <i>PTPN3</i>                   | CTGATTCACAAGAACCCGACAGA             | GAGAAGCAGCCTGTCCAC                   |
|             | St3_OT_17        | <i>CTTNBP2</i>                 | CAAGGAGATAAAGAGTGGGTGGAC            | GGAGCTATGCCATTTCTTGGCTC              |
|             | St3_OT_18        | <i>MIR8054</i>                 | CTTGACCGGTAACCTGGACTAG              | CAGTTGGTGGAGTTCTTCAATTCCC            |
|             | St3_OT_19        | <i>PLS1</i>                    | TGCTGTGAAAGTGTATGTTCTGGGG           | TGGGTTGATGATCTTGGCTGG                |
|             | St3_OT_20        | <i>NKAIN2</i>                  | AGAAACACGAGAATTGCATCCTCAGGAC        | CATAACCAGGTTGGTGCCTTATATACATTATTCTAC |
|             | St3_OT_21        | <i>ADGRF5</i>                  | TGAGATAGGTGTGGAAACTGCTGC            | CTGACCCAGGGAAGGAAAGG                 |
|             | St3_OT_22        | <i>C3orf56</i>                 | CTGAAGGAGTCTTCCACCGCC               | TGTGGACACGAGTGGGTTGG                 |
|             | St3_OT_23        | <i>PABPC4L</i>                 | CAGGTTGCTTTCGTGCTCACTTTC            | CCAGGCCATGGGATTTCTGAAAC              |
| St3_OT_24   | <i>PSD4</i>      | CTTGAGGTGAGGCAAGCCAG           | CCTTCTCAGGTCGGCTGTG                 |                                      |
